# Supplementary material for: Orchestrated Response of Intracellular Zwitterionic Metabolites in Stress Adaptation of the Halophilic Heterotrophic Bacterium Pelagibaca bermudensis
Source: MDPI journal article supplement (doi:10.3390/md20110727), 2022-11-19
Supplement: s1 [file s1]

## Supplementary Materials

# Orchestrated Response of Intracellular Zwitterionic Metabolites in Stress Adaptation of the Halophilic Heterotrophic Bacterium *Pelagibaca bermudensis*

Muhaiminatul Azizah <sup>1</sup> and Georg Pohnert <sup>1,2,\*</sup>

<sup>1</sup> Bioorganic Analytics, Institute for Inorganic and Analytical Chemistry, Friedrich Schiller University, Lessingstrasse 8, D-07743 Jena, Germany

<sup>2</sup> MPG Fellow Group, Max Planck Institute for Chemical Ecology, Hans-Knöll-Straße 8, D-07745 Jena, Germany

\* Correspondence: georg.pohnert@uni-jena.de

### Contents:

**Figure S1.1 – S1.2** Chromatographic profile of zwitterionic metabolites from *P. bermudensis* using UHPLC with detection by ESI-HRMS.

**Figure S2.1.** Comparison of MS/MS spectra of DMSP from *P. bermudensis* and reference standard

**Figure S2.2.** Comparison of MS/MS spectra of DMSOP from *P. bermudensis* and reference standard

**Figure S2.3.** Comparison of MS/MS spectra of cysteinolic acid from *P. bermudensis* and reference standard

**Figure S2.4.** Comparison of MS/MS spectra of gonyol from *P. bermudensis* and reference standard

**Figure S2.5.** Comparison of MS/MS spectra of glycine betaine (GBT) from *P. bermudensis* and reference standard

**Figure S2.6.** Comparison of MS/MS spectra of carnitine from *P. bermudensis* and reference standard

**Figure S2.7.** Comparison of MS/MS spectra of ectoine from *P. bermudensis* and reference standard

**Figure S2.8.** Comparison of MS/MS spectra of choline from *P. bermudensis* and reference standard

**Figure S2.9.** Comparison of MS/MS spectra of 4-hydroxyproline from *P. bermudensis* and reference standard

**Figure S2.10.** Comparison of MS/MS spectra of proline from *P. bermudensis* and reference standard

**Figure S2.11.** Comparison of MS/MS spectra of sarcosine from *P. bermudensis* and reference standard

**Figure S3.1.** OD<sub>600</sub> during the growth curve of *P. bermudensis* cultures grown in marine broth with NaCl concentration of 0.33 M – 1.33 M

**Figure S3.2.** OD<sub>600</sub> during the growth curve of *P. bermudensis* cultures grown in marine broth with NaCl concentration of 0.033 M – 0.33 M and the absence of NaCl

**Figure S3.3.** OD<sub>600</sub> during the growth curve of *P. bermudensis* cultures grown in marine broth with a temperature range of 18 °C – 38 °C; error bars represent standard deviation of three biological replicates.

**Figure S3.4.** OD<sub>600</sub> during the growth curve of *P. bermudensis* cultures grown in marine broth under incubation with extract of *T. striata*; error bars represent standard deviation of three biological replicates

**Figure S4.** Cell densities of *P. bermudensis* under different stress treatments.

**Figure S5.** The intracellular concentration of sulfur- and nitrogen-containing zwitterionic metabolites in *P. bermudensis* HTCC2601 after treatment with *T. striata* extracts in different concentrations.

**Table S1.** Concentration of sulfur- and nitrogen-containing zwitterionic metabolites from *T. striata* by LC-HRMS

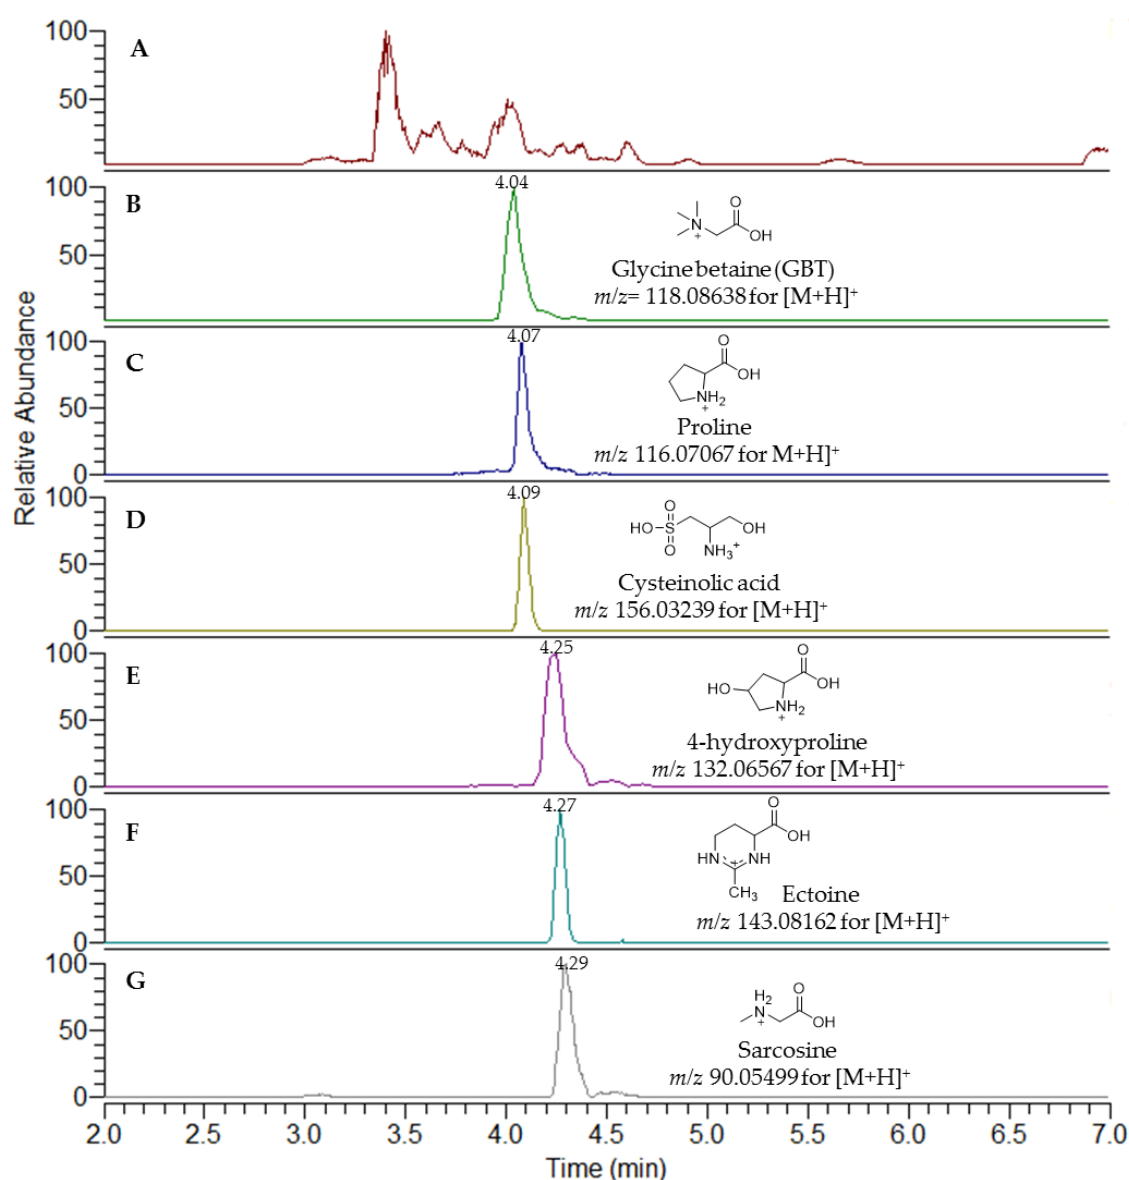

**Figure S1.1** Chromatographic profile of zwitterionic metabolites from *P. bermudensis* using UHPLC with detection by ESI-HRMS. (A) Total Ion Count (TIC), (B) GBT ion trace  $m/z$  118.08638, (C) proline ion trace  $m/z$  116.07067, (D) Cysteinolic acid ion trace  $m/z$  156.03239, (E) 4-hydroxyproline ion trace  $m/z$  132.06567 (F) ectoine ion trace  $m/z$  143.08162, (G) Sarcosine ion trace  $m/z$  90.05499.

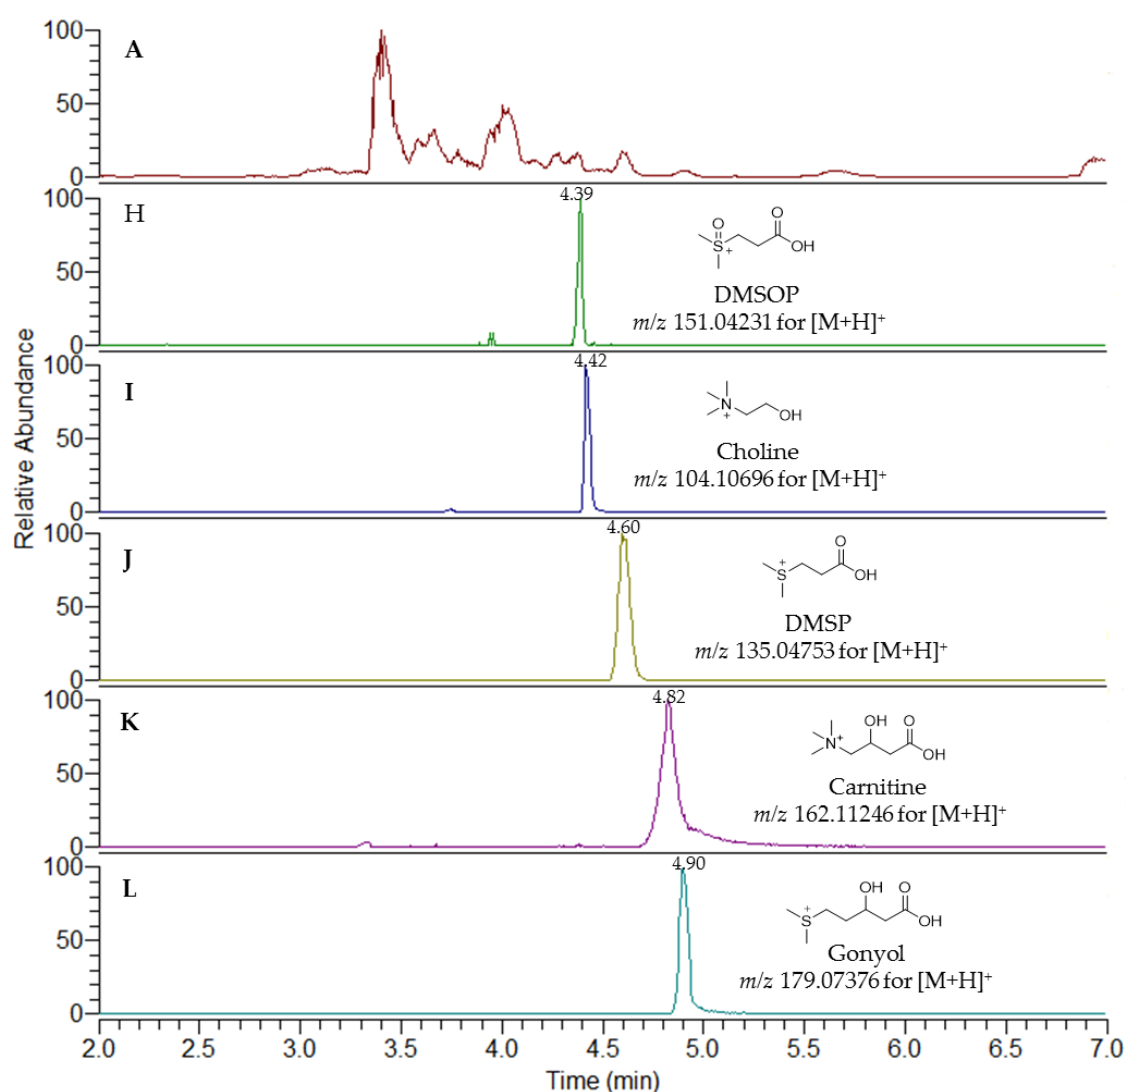

**Figure S1.2** Chromatographic profile of zwitterionic metabolites from *P. bermudensis* using UHPLC with detection by ESI-HRMS. **(A)** Total Ion Count (TIC), **(H)** DMSOP ion trace  $m/z$  151.04231, **(I)** Choline ion trace  $m/z$  104.10696, **(J)** DMSP ion trace  $m/z$  135.04753, **(K)** carnitine ion trace  $m/z$  162.11246 **(L)** Gonyol ion trace  $m/z$  179.07376.

#### Comparison of MS/MS spectra of zwitterionic metabolites from *P. bermudensis* and reference standards

All MS/MS spectra of our reference standards were deposited and publicly available online in the GNPS spectral libraries. The charts were made using the Metabolomics Spectrum Resolver (<https://metabolomics-usi.ucsd.edu/>) [1] and scannable QR-codes link out to the individual annotated charts and library spectra with their metadata. All spectral mirror charts had cosine similarity scores not lesser than 0.98. Identical MS/MS spectra proved the identity of compounds from *P. bermudensis* were identical compounds with reference standards.

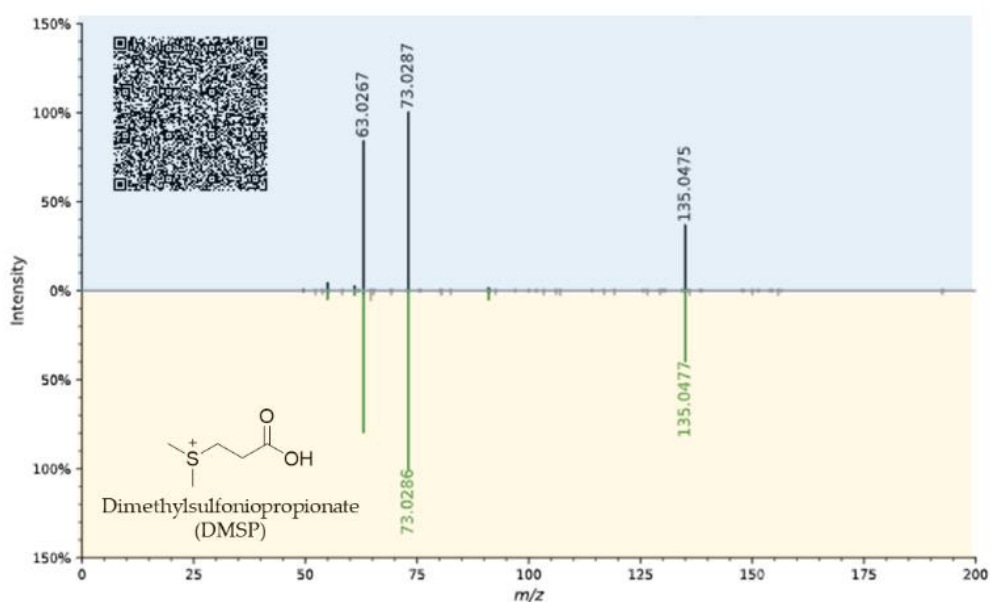

**Figure S2.1.** Comparison of MS/MS spectra of DMSP from *P. bermudensis* (top plot) and reference standard (bottom plot). Link could be found here, CCMSLIB00006716179

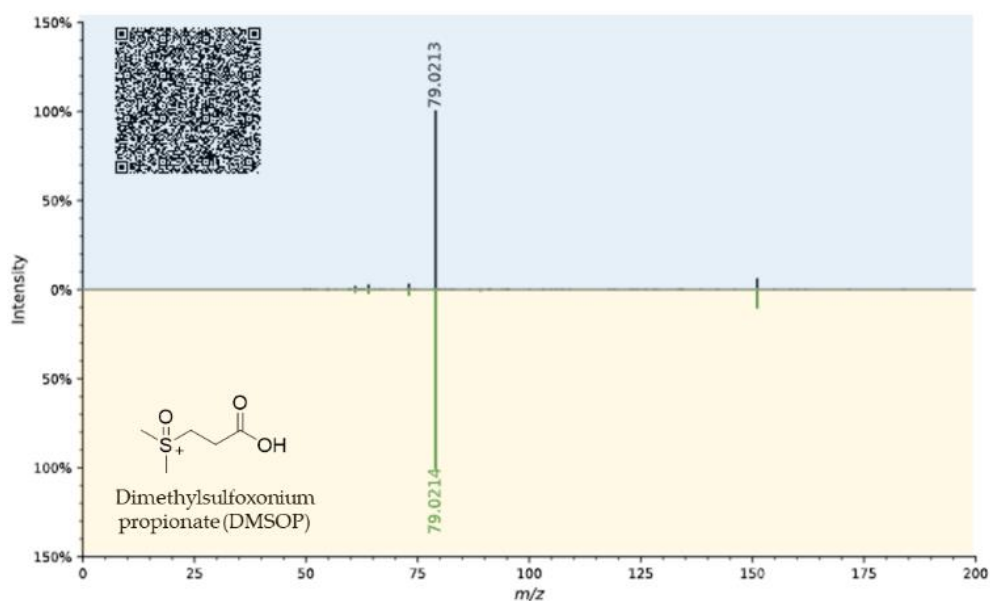

**Figure S2.2.** Comparison of MS/MS spectra of DMSOP from *P. bermudensis* (top plot) and reference standard (bottom plot). Link could be found here, CCMSLIB00006716180

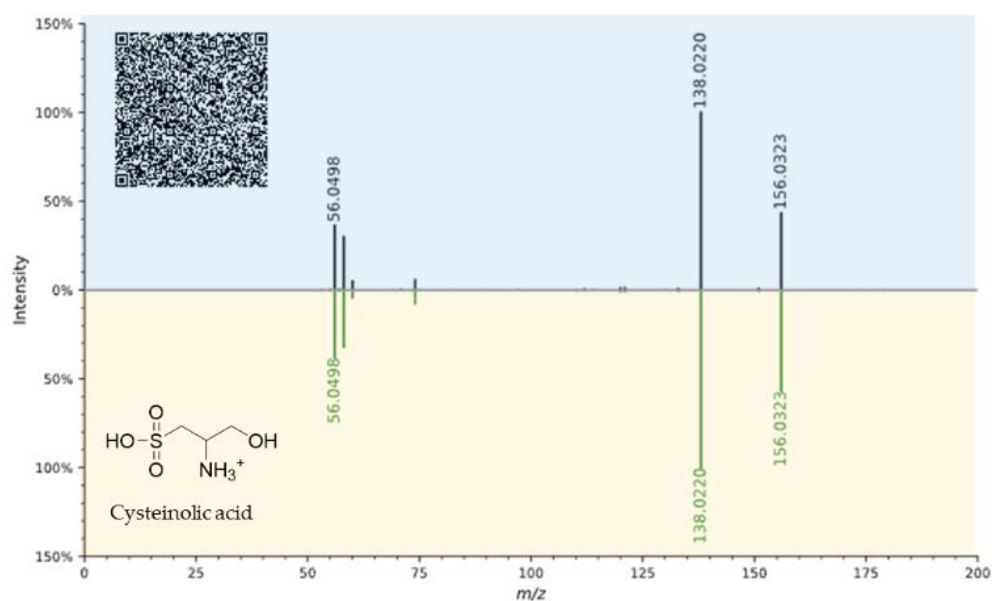

**Figure S2.3.** Comparison of MS/MS spectra of cysteinolic acid from *P. bermudensis* (top plot) and reference standard (bottom plot). Link could be found here, CCMSLIB00008851455

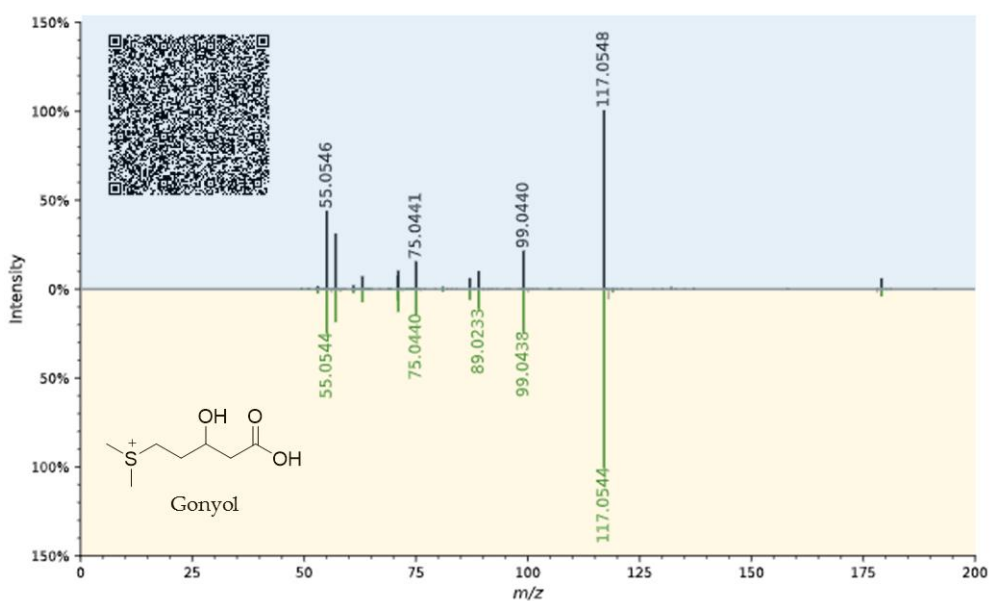

**Figure S2.4.** Comparison of MS/MS spectra of gonyol from *P. bermudensis* (top plot) and reference standard (bottom plot). Link could be found here, CCMSLIB00006716181

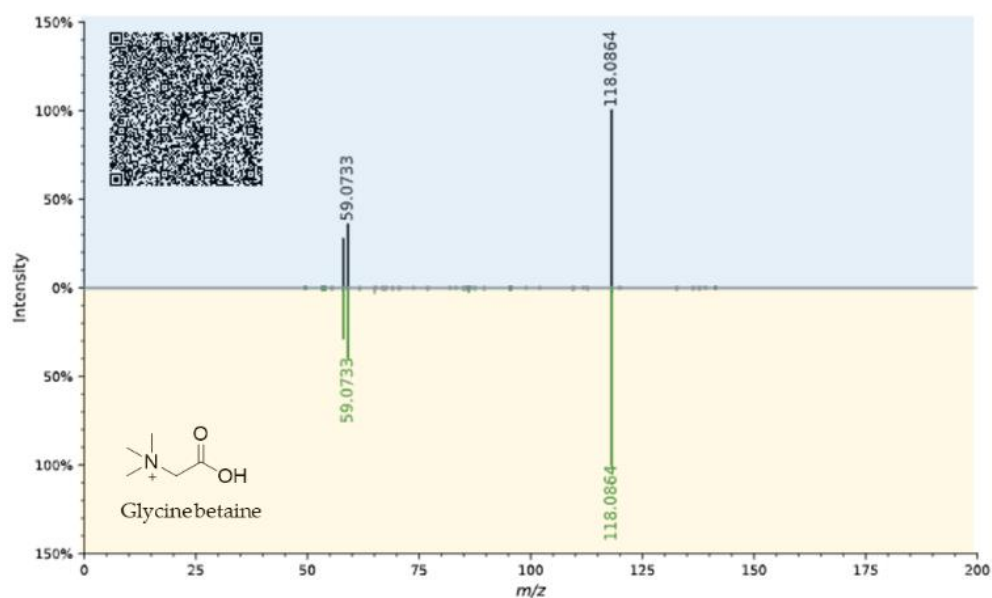

**Figure S2.5.** Comparison of MS/MS spectra of glycine betaine (GBT) from *P. bermudensis* (top plot) and reference standard (bottom plot). Link could be found here, CCMSLIB00006716183

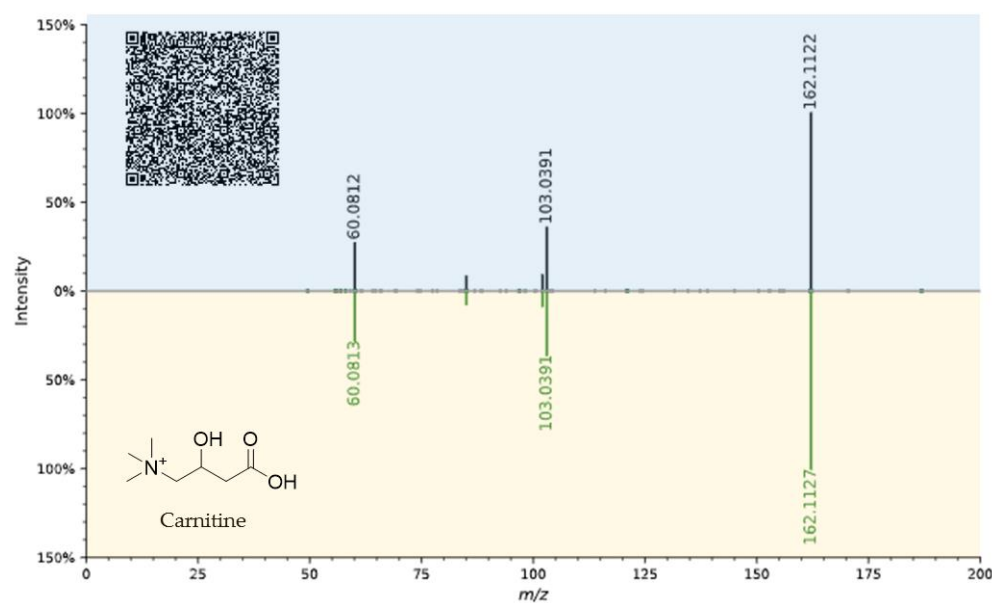

**Figure S2.6.** Comparison of MS/MS spectra of carnitine from *P. bermudensis* (top plot) and reference standard (bottom plot). Link could be found here, CCMSLIB00008851519

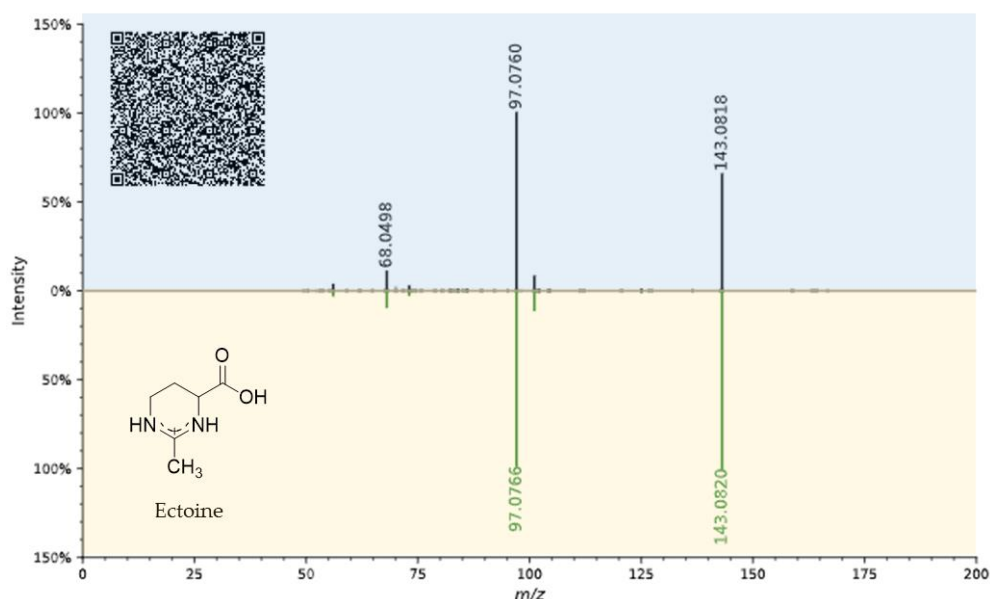

**Figure S2.7.** Comparison of MS/MS spectra of ectoine from *P. bermudensis* (top plot) and reference standard (bottom plot). Link could be found here, CCMSLIB00006717988

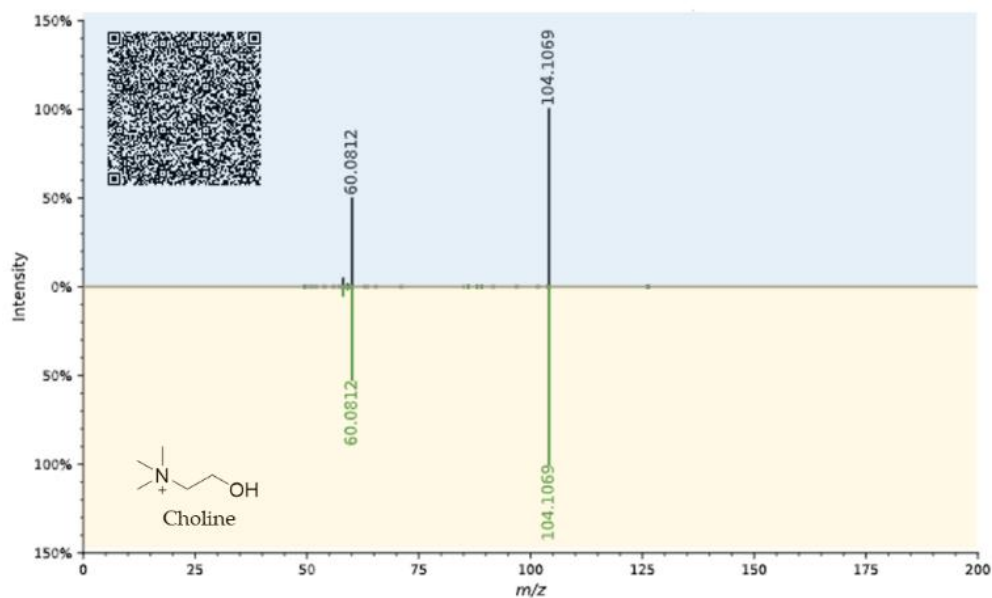

**Figure S2.8.** Comparison of MS/MS spectra of choline from *P. bermudensis* (top plot) and reference standard (bottom plot). Link could be found here, CCMSLIB00008851521

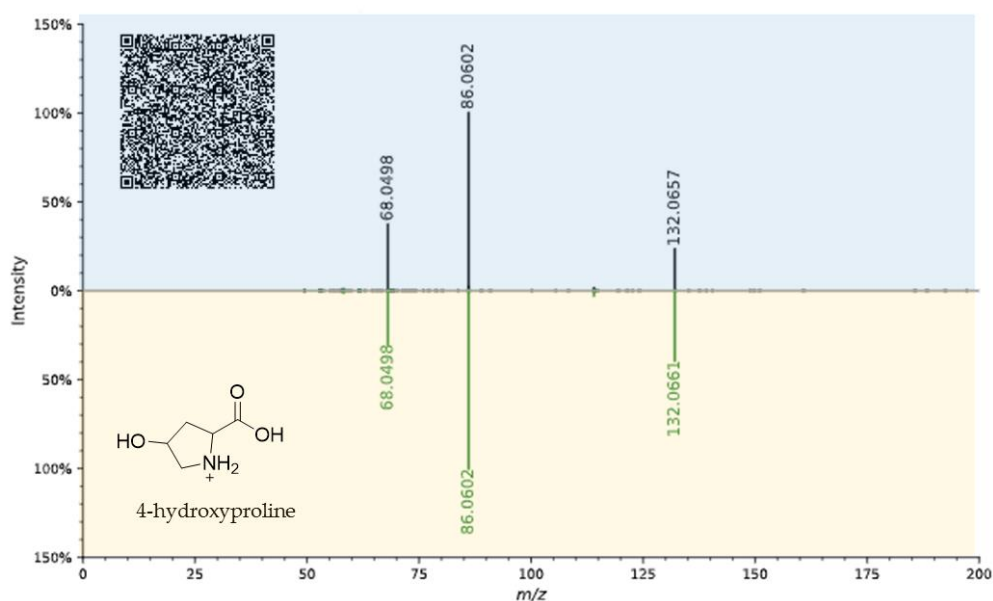

**Figure S2.9.** Comparison of MS/MS spectra of 4-hydroxyproline from *P. bermudensis* (top plot) and reference standard (bottom plot). Link could be found here, CCMSLIB00010013001

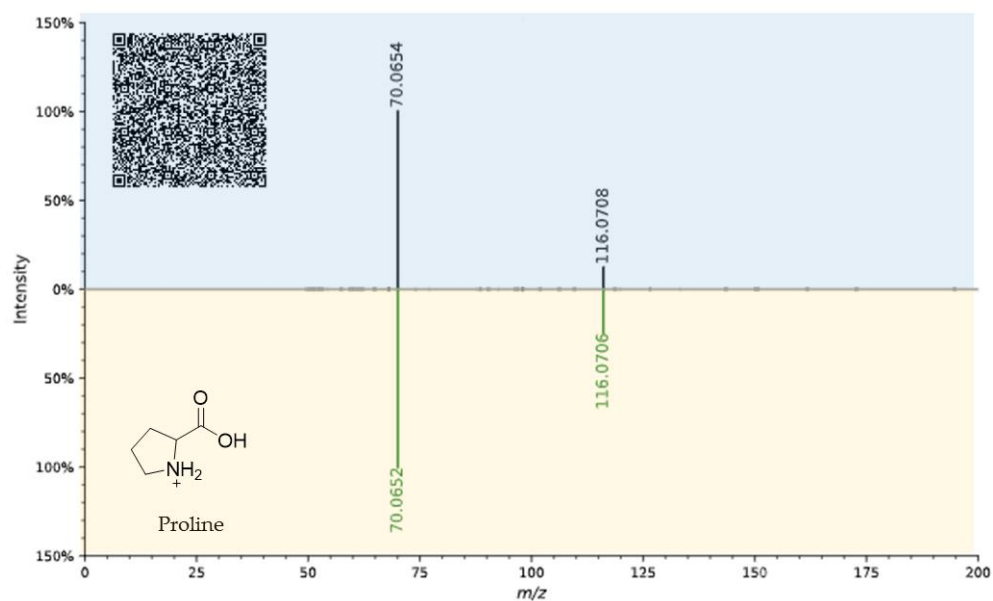

**Figure S2.10.** Comparison of MS/MS spectra of proline from *P. bermudensis* (top plot) and reference standard (bottom plot). Link could be found here, CCMSLIB00008851522



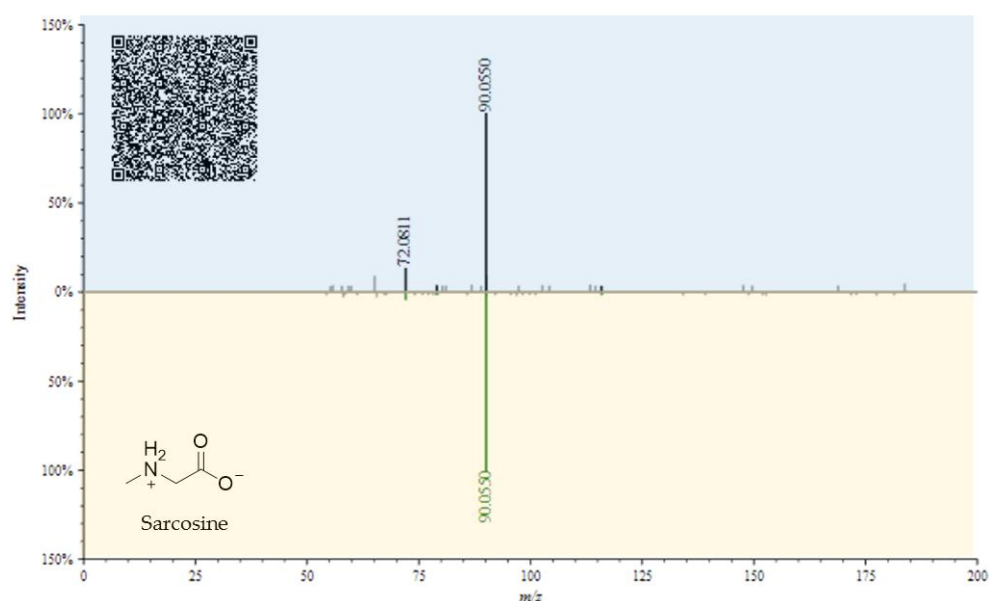

**Figure S2.11.** Comparison of MS/MS spectra of sarcosine from *P. bermudensis* (top plot) and reference standard (bottom plot). Link could be found here, CCMSLIB00008851520

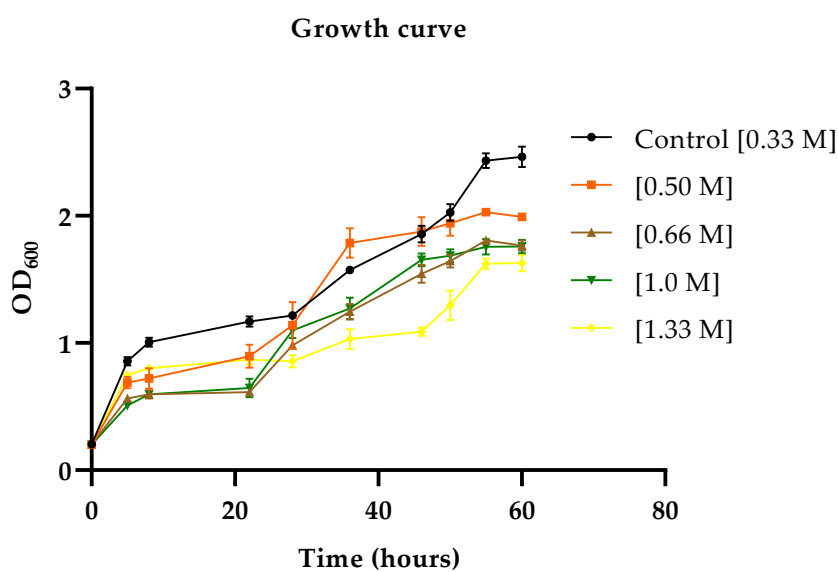

**Figure S3.1.** OD<sub>600</sub> during the growth curve of *P. bermudensis* cultures grown in marine broth in NaCl concentration of 0.33 M – 1.33 M. Error bars represent standard deviation of three biological replicates. Sampling for extraction was taken at the late exponential phase.

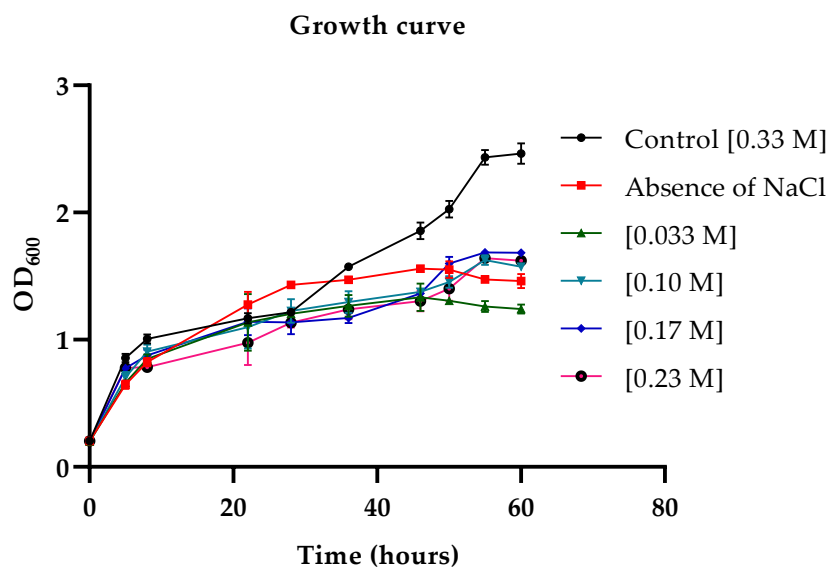

**Figure S3.2.** OD<sub>600</sub> during the growth curve of *P. bermudensis* cultures grown in marine broth with NaCl concentration of 0.033 M – 0.33 M and the absence of NaCl. Error bars represent standard deviation of three biological replicates.

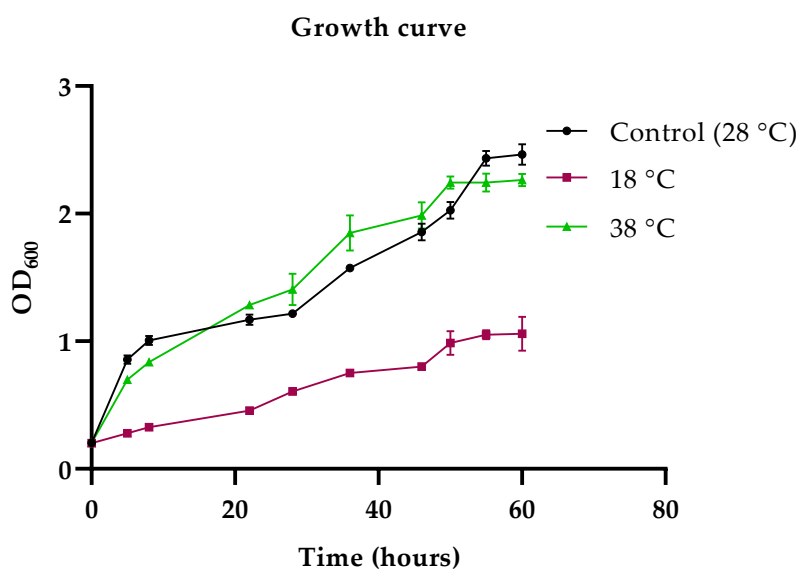

**Figure S3.3.** OD<sub>600</sub> during the growth curve of *P. bermudensis* cultures grown in marine broth with a temperature range of 18 °C - 38 °C. Error bars represent standard deviation of three biological replicates.

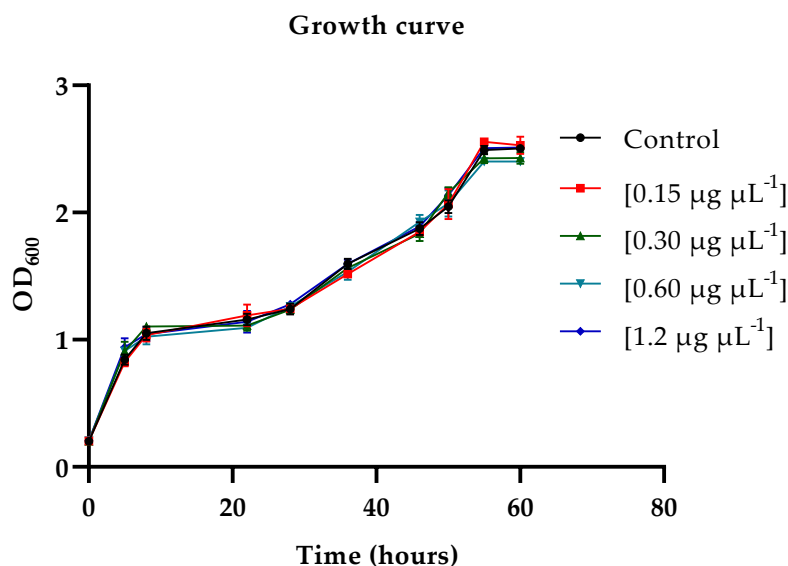

**Figure S3.4.** OD<sub>600</sub> during the growth curve of *P. bermudensis* cultures grown in marine broth under the exposure to *T. striata* extract in different concentrations (0.15 µg µL<sup>-1</sup>, 0.30 µg µL<sup>-1</sup>, 0.60 µg µL<sup>-1</sup>, and 1.2 µg µL<sup>-1</sup>). Error bars represent standard deviation of three biological replicates.

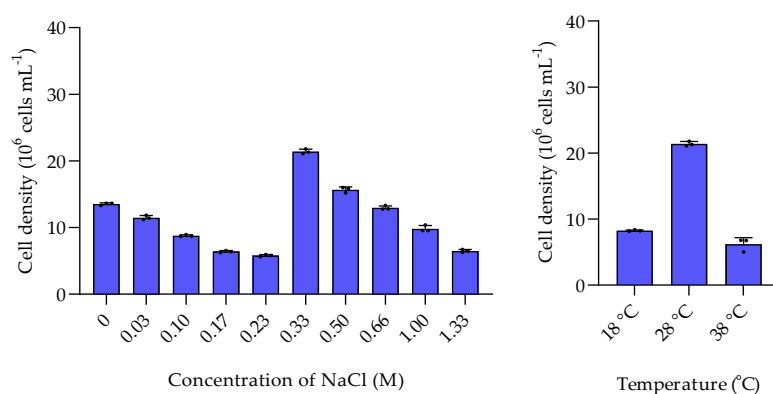

**Figure S4.** Cell densities of *P. bermudensis* under different stress treatments at the late exponential phase.

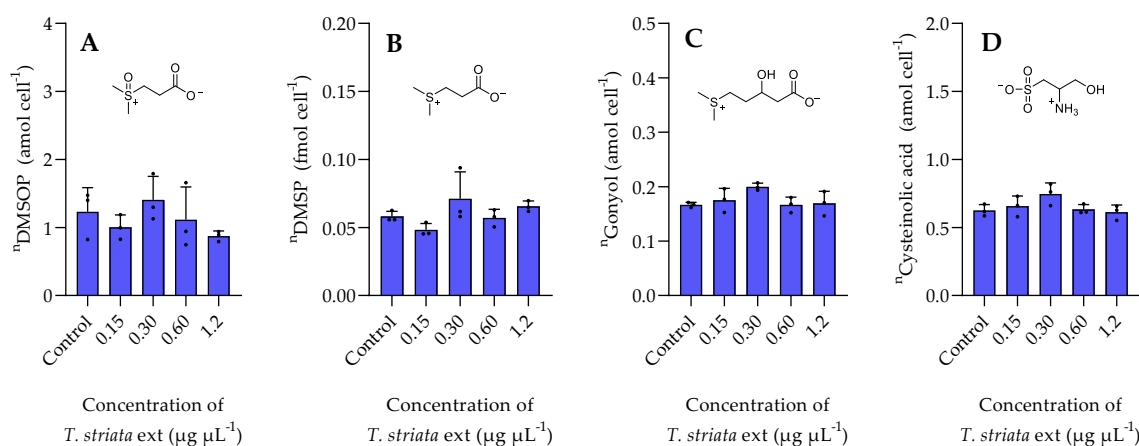

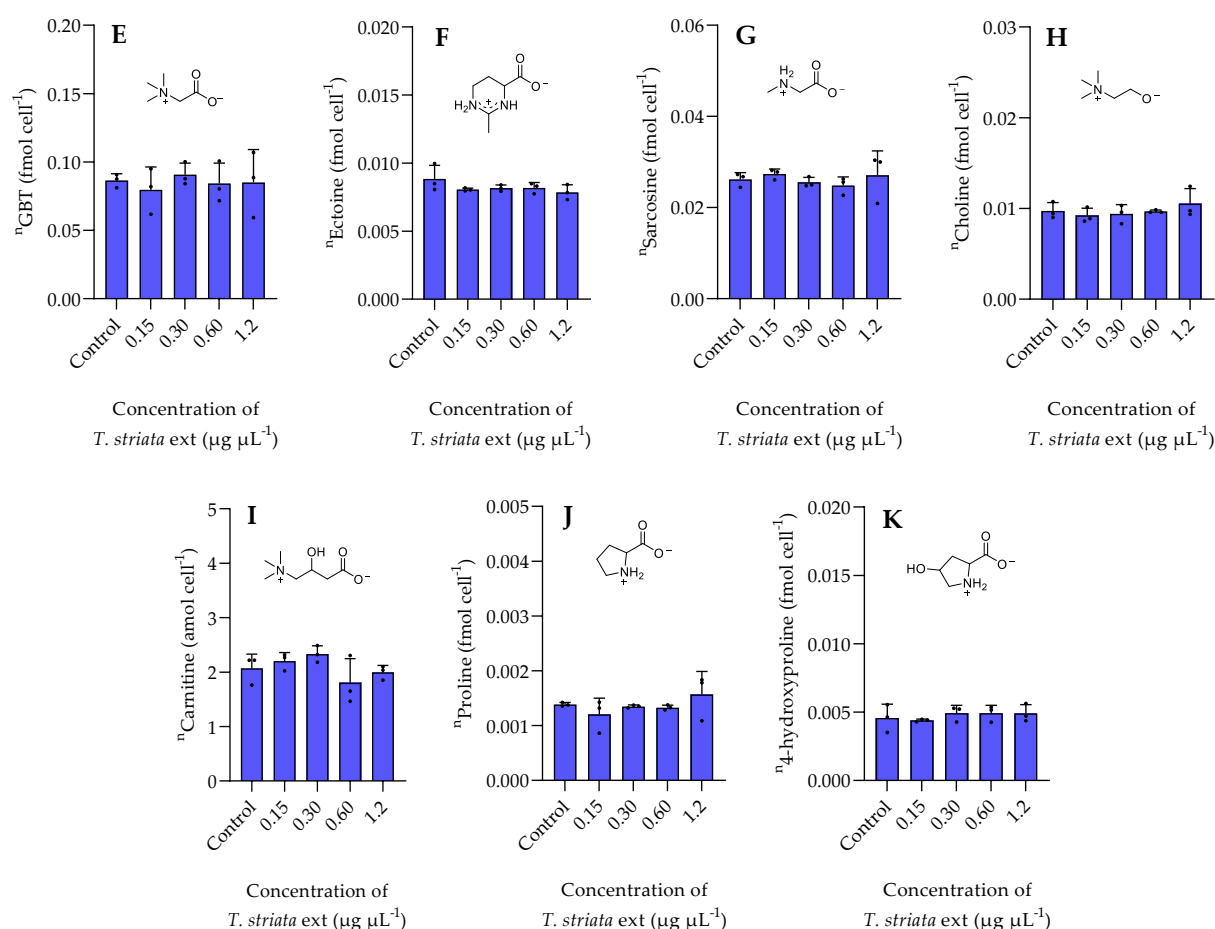

**Figure S5.** The intracellular concentration of sulfur- and nitrogen-containing zwitterionic metabolites in *P. bermudensis* HTCC2601 after treatment with *T. striata* extracts in different concentrations. (A) DMSOP, (B) DMSP, (C) gonyol, (D) cysteinolic acid, (E) GBT, (F) ectoine, (G) sarcosine, (H) choline, (I) carnitine, (J) proline, and (K) 4-hydroxyproline. Concentrations are normalized based on the cell count, error bars represent standard deviation (biological replicates, N = 3). Statistical analysis is based on One-Way ANOVA with a Tukey test for multiple comparison procedures. All statistical analyses were performed with a 95% confidence interval using GraphPad Prism 9.3.1 version.  $p > 0.05$  is considered not significantly different. No statistically significant changes upon addition of *T. striata* extract were observed. Ext: extract;  $n$  = amounts per cell.

**Table S1.** Concentration of sulfur- and nitrogen-containing zwitterionic metabolites from *T. striata* by LC-HRMS

| Zwitterionic metabolites | Concentration of metabolites*   |
|--------------------------|---------------------------------|
|                          | (Mean $\pm$ Standard Deviation) |
| Glycine betaine (GBT)    | 0.98 $\pm$ 0.11                 |
| DMSP                     | 0.19 $\pm$ 0.013                |
| Cysteinolic acid         | 0.046 $\pm$ 0.0016              |
| Ectoine                  | 0.016 $\pm$ 0.00089             |
| Sarcosine                | 0.010 $\pm$ 0.00036             |
| DMSOP                    | 0.0091 $\pm$ 0.0017             |
| Proline                  | 0.00068 $\pm$ 0.00012           |
| Choline                  | 0.00040 $\pm$ 0.000043          |
| Hydroxyproline           | 0.00045 $\pm$ 0.000045          |
| Carnitine                | 0.000039 $\pm$ 0.0000047        |

\* Mean  $\pm$  Standard Deviation were expressed in  $\mu\text{g mg}^{-1}$  dried algal extract (biological replicates, N = 3)

Reference:

1. Bittremieux, W.; Chen, C.; Dorrestein, P. C.; Schymanski, E. L.; Schulze, T.; Neumann, S.; Meier, R.; Rogers, S.; Wang, M. Universal MS/MS visualization and retrieval with the metabolomics spectrum resolver web service. *bioRxiv* **2020**.
